# Supplementary material for: One‐stage individual participant data meta‐analysis models: estimation of treatment‐covariate interactions must avoid ecological bias by separating out within‐trial and across‐trial information
Source: PubMed Central journal article supplement (PMC5299543; doi:10.1002/sim.7171), 2016-12-01
Supplement: SIM-36-772-s001.pdf [file SIM-36-772-s001.pdf]

1  
2  
3  
4  
5  
6  
7  
8  
9  
10  
11  
12  
13  
14  
15  
16  
17  
18  
19  
20  
21  
22  
23  
24  
25  
26  
27  
28  
29  
30  
31  
32  
33  
34  
35  
36  
37  
38  
39  
40  
41  
42  
43  
44  
45  
46  
47  
48  
49

Supplementary material: Full epilepsy example results

| Outcome                    | Covariate              | Model | Parameter Estimate (s.e.) |                      |                      |        | Model | Parameter Estimate (s.e.) |                      |                   |                      |        |
|----------------------------|------------------------|-------|---------------------------|----------------------|----------------------|--------|-------|---------------------------|----------------------|-------------------|----------------------|--------|
|                            |                        |       | $B_{drug}$                | $\beta_{cov}$        | $\beta_T$            | $\tau$ |       | $B_{drug}$                | $\beta_{cov}$        | $\beta_W$         | $\beta_A$            | $\tau$ |
| Time to 12 month remission | Age at randomisation   | (1)   | 0.199<br>(0.129)          | 0.008<br>(0.003)     | -0.011***<br>(0.004) | 0.004  | (3)   | 0.269*<br>(0.158)         | 0.006<br>(0.004)     | -0.007<br>(0.006) | -0.013***<br>(0.005) | 0.004  |
|                            |                        | (2)   | 0.199<br>(0.129)          | 0.008**<br>(0.003)   | -0.011***<br>(0.004) |        | (4)   | 0.269*<br>(0.158)         | 0.006<br>(0.004)     | -0.007<br>(0.006) | -0.013***<br>(0.005) |        |
|                            | Epilepsy type          | (1)   | -0.035<br>(0.113)         | -0.238**<br>(0.110)  | -0.128<br>(0.147)    |        | (3)   | 0.168<br>(0.197)          | -0.287**<br>(0.118)  | -0.026<br>(0.168) | -0.467<br>(0.307)    |        |
|                            |                        | (2)   | -0.039<br>(0.132)         | -0.256**<br>(0.113)  | -0.090<br>(0.156)    | 0.136  | (4)   | 0.186<br>(0.239)          | -0.287**<br>(0.118)  | -0.025<br>(0.168) | -0.479<br>(0.376)    | 0.106  |
|                            | Log number of seizures | (1)   | -0.037<br>(0.121)         | -0.166***<br>(0.040) | -0.025<br>(0.056)    |        | (3)   | 0.112<br>(0.245)          | -0.171***<br>(0.041) | -0.014<br>(0.058) | -0.100<br>(0.122)    |        |
|                            |                        | (2)   | -0.030<br>(0.131)         | -0.168***<br>(0.040) | -0.020<br>(0.057)    | 0.104  | (4)   | 0.134<br>(0.285)          | -0.171***<br>(0.041) | -0.013<br>(0.058) | -0.105<br>(0.142)    | 0.096  |

N.B. \* for P-value < 0.1, \*\* for P-value < 0.05 and \*\*\* for P-value < 0.01
